# Supplementary material for: Surgical window of opportunity trial reveals mechanisms of response and resistance to navtemadlin (KRT-232) in patients with recurrent glioblastoma
Source: bioRxiv or medRxiv preprint supplement (doi:10.1101/2024.08.12.24311893), 2024-08-14

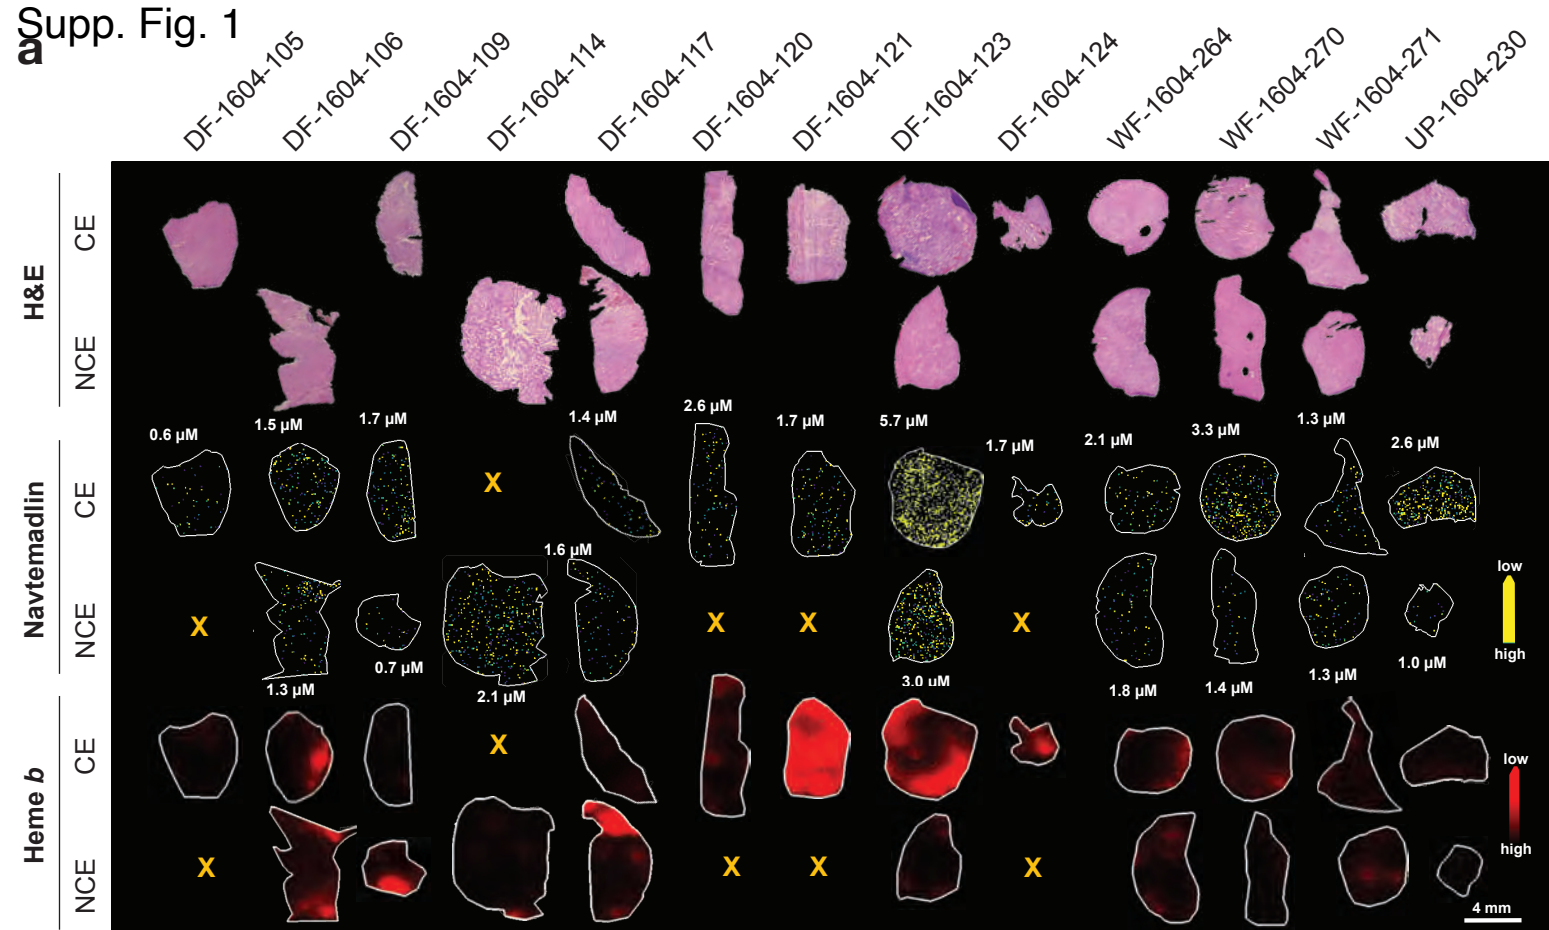

**b**

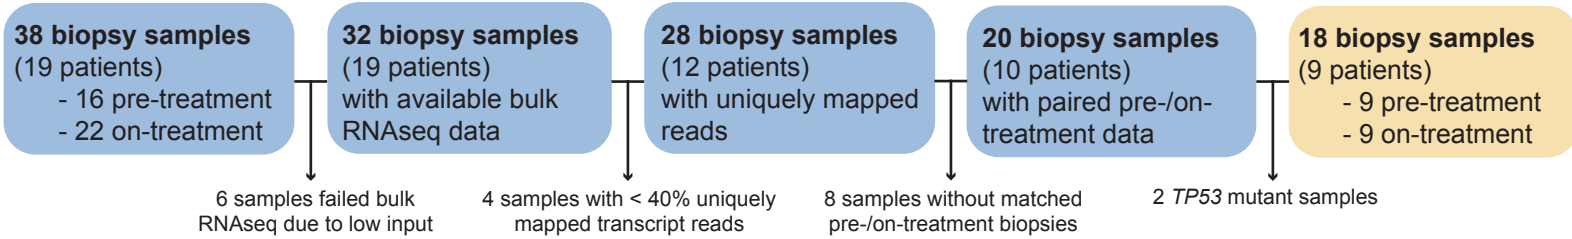

**c** TP53 transcriptional targets in navtemadlin patient biopsies

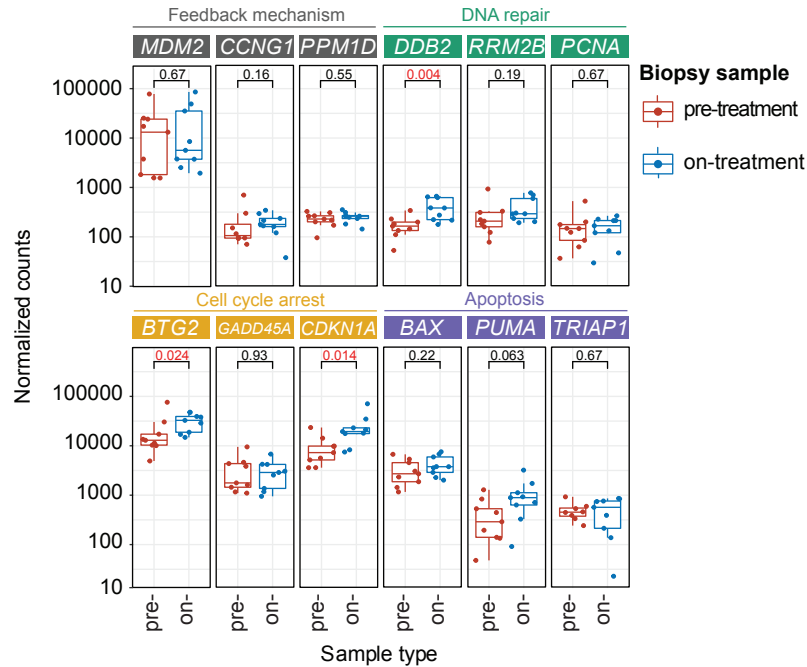

**d** TP53 transcriptional targets in GLASS control samples

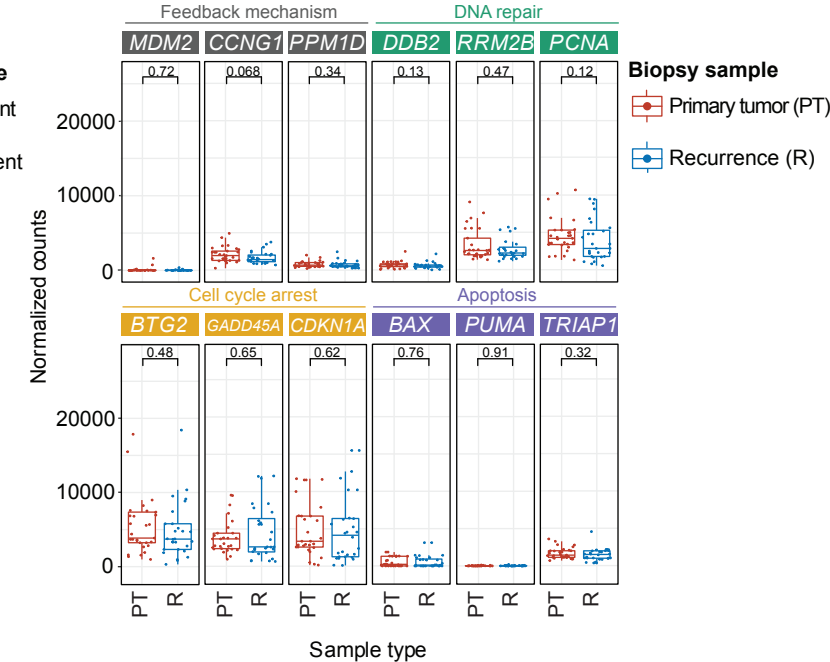

DMSO

Navtemadlin  
Continuous

Navtemadlin  
Pulse

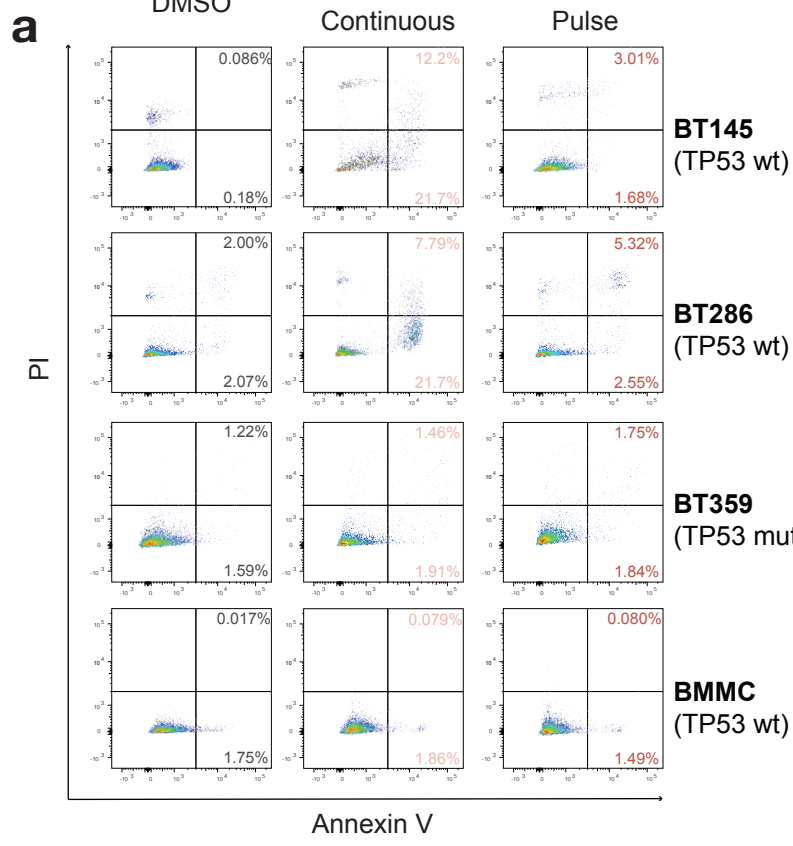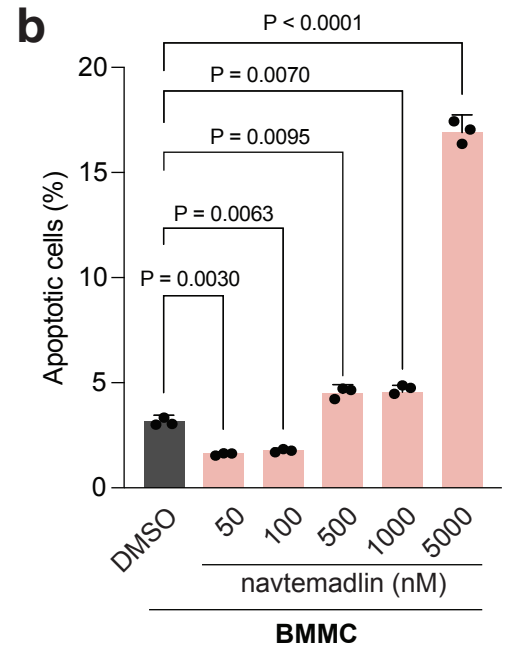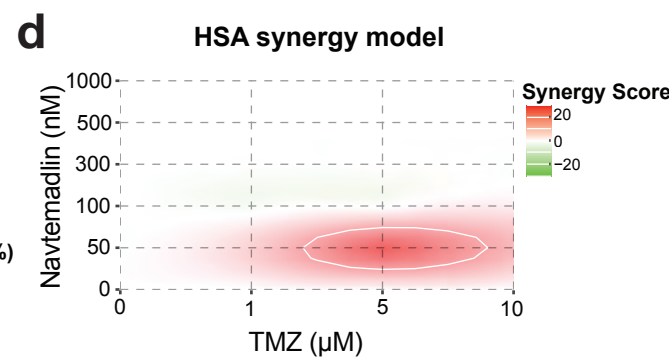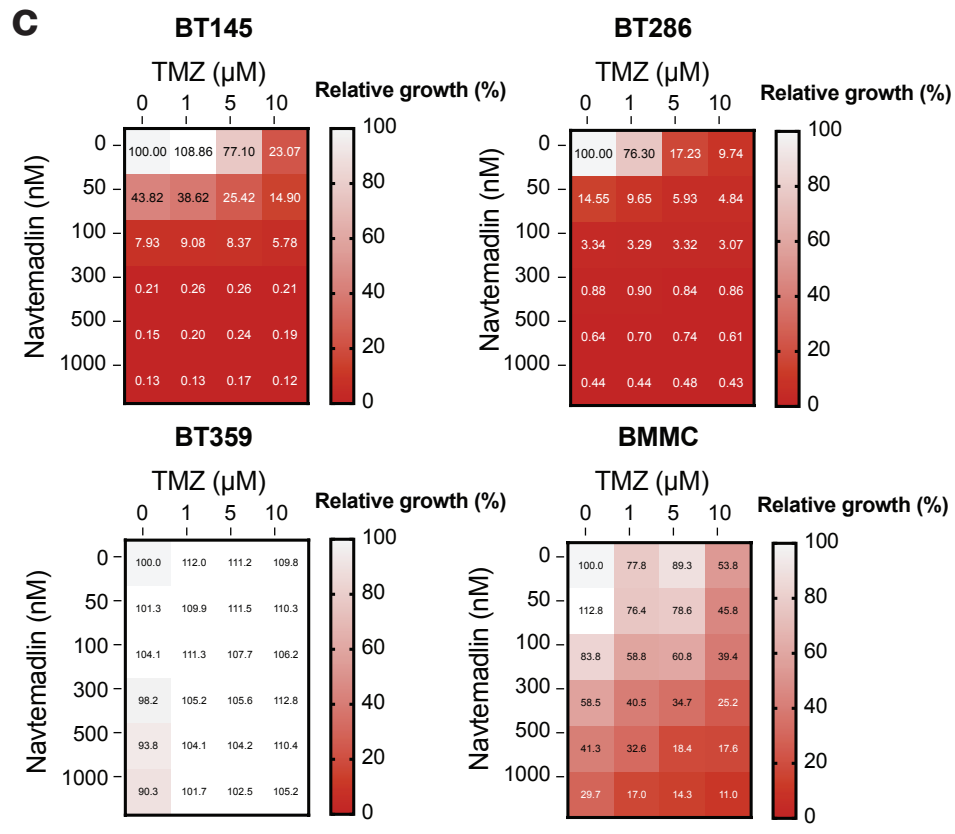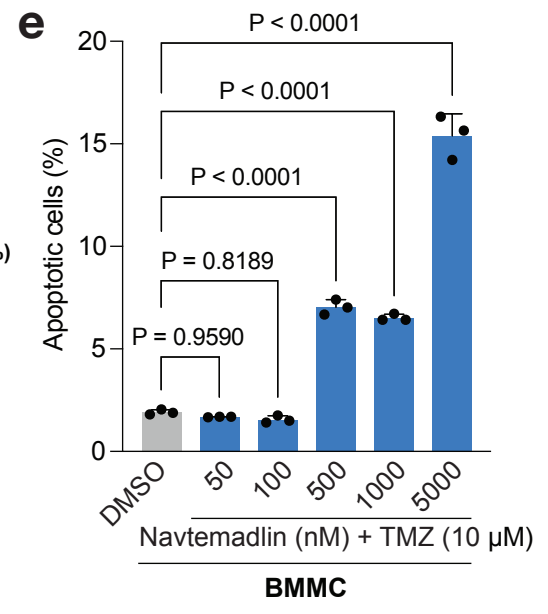

Supplement: Supplementary file [file media-1.pdf]
